# Supplementary material for: EMPOWER-UP: psychometric evaluation of a generic questionnaire for assessing empowerment in relational decision-making and problem-solving among adults with long-term health conditions
Source: Research Square preprint supplement (doi:10.21203/rs.3.rs-3772053/v2), 2025-12-15
Supplement: Supplementary file 1 [file cfc348d36fca835df0618c76.docx]

| Additional file 3. Item parameters and fit indices from IRT analysis | | | | | | | | | | | | | | |
| --- | --- | --- | --- | --- | --- | --- | --- | --- | --- | --- | --- | --- | --- | --- |
| Draft item no.  Figure 3 Wright Maps depicting item locations (to the right) relative to person locations (to the left) in the three subscales in EMPOWER-UP | **Item location** | **Category thresholds** | | | | **χ2** | **df** | **p-value** | | **RMSEA** | **Outfit MSQ** | **Infit MSQ** | **Outfit z-stat** | **Infit  z-stat** |
| **1** | **2** | **3** | **4** |
| Subscale 1 – Empowering Mechanisms | | | | | | | | | | | | | | |
| d1 | -2.643 | -4.283 | -3.050 | -2.679 | -0.559 | 58.616 | 54 | 0.310 | | 0.014 | 0.747 | 0.999 | -1.636 | 0.013 |
| d2 | -2.581 | -3.835 | -2.931 | -2.780 | -0.779 | 63.700 | 54 | 0.172 | | 0.020 | 0.645 | 0.881 | -2.175 | -1.355 |
| d3 | -2.270 | -3.854 | -2.682 | -2.079 | -0.467 | 54.484 | 59 | 0.642 | | 0.000 | 0.574 | 0.711 | -3.134 | -3.888 |
| d4 | -2.174 | -4.304 | -2.301 | -1.792 | -0.300 | 63.452 | 59 | 0.322 | | 0.013 | 0.613 | 0.753 | -2.997 | -3.394 |
| d5 | -1.385 | -3.139 | -2.065 | -0.844 | 0.508 | 60.004 | 71 | 0.821 | | 0.000 | 0.862 | 0.907 | -1.321 | -1.301 |
| d6 | -1.089 | -2.954 | -1.397 | -0.867 | 0.861 | 86.805 | 71 | 0.098 | | 0.023 | 1.281 | 1.293 | 2.730 | 3.748 |
| d7 | -1.090 | -2.827 | -1.798 | -0.618 | 0.882 | 61.480 | 71 | 0.783 | | 0.000 | 0.873 | 0.916 | -1.361 | -1.179 |
| d8 | -1.311 | -3.299 | -1.890 | -0.584 | 0.528 | 62.199 | 72 | 0.788 | | 0.000 | 0.892 | 0.936 | -1.011 | -0.887 |
| d9 | -1.578 | -3.098 | -2.150 | -1.361 | 0.297 | 87.503 | 70 | 0.077 | | 0.024 | 0.830 | 0.861 | -1.519 | -1.900 |
| d10 | -1.726 | -3.140 | -2.614 | -1.532 | 0.383 | 55.533 | 63 | 0.737 | | 0.000 | 0.768 | 0.820 | -2.227 | -2.479 |
| d11 | -1.424 | -3.440 | -1.722 | -1.111 | 0.578 | 67.396 | 71 | 0.599 | | 0.000 | 0.808 | 0.841 | -1.947 | -2.280 |
| d13 | -1.617 | -3.965 | -2.551 | -0.909 | 0.956 | 46.925 | 68 | 0.976 | | 0.000 | 0.861 | 0.862 | -1.590 | -2.025 |
| d15 | -1.736 | -3.975 | -2.719 | -1.185 | 0.935 | 74.557 | 63 | 0.151 | | 0.021 | 1.007 | 0.999 | 0.106 | 0.006 |
| d16 | -1.584 | -2.372 | -2.911 | -0.889 | -0.164 | 57.163 | 65 | 0.745 | | 0.000 | 0.908 | 0.802 | -0.615 | -2.892 |
| d17 | -1.328 | -3.171 | -2.036 | -0.662 | 0.556 | 81.385 | 72 | 0.210 | | 0.017 | 0.937 | 0.990 | -0.580 | -0.121 |
| d23 | -0.968 | -3.522 | -2.074 | -0.341 | 2.065 | 78.221 | 64 | 0.109 | | 0.023 | 1.154 | 1.230 | 2.076 | 3.138 |
| d27 | -1.412 | -3.476 | -2.412 | -0.972 | 1.213 | 54.543 | 65 | 0.819 | | 0.000 | 0.955 | 0.964 | -0.516 | -0.490 |
| d30 | -1.735 | -4.093 | -2.735 | -1.091 | 0.977 | 52.024 | 63 | 0.837 | | 0.000 | 1.073 | 1.087 | 0.831 | 1.214 |
| d32 | -0.979 | -3.108 | -1.959 | -0.472 | 1.622 | 48.429 | 66 | 0.949 | | 0.000 | 0.853 | 0.906 | -1.971 | -1.364 |
| d33 | -1.360 | -3.123 | -2.368 | -1.000 | 1.051 | 93.923 | 70 | 0.030 | | 0.028 | 1.568 | 1.425 | 5.483 | 5.215 |
| d34 | -1.109 | -3.198 | -2.532 | -0.073 | 1.367 | 56.766 | 62 | 0.664 | | 0.000 | 0.979 | 1.042 | -0.223 | 0.621 |
| d35 | -1.487 | -3.337 | -2.328 | -1.142 | 0.858 | 71.394 | 69 | 0.398 | | 0.009 | 0.997 | 0.926 | 0.000 | -1.013 |
| Subscale 2 – Disempowering Mechanisms | | | | | | | | | | | | | | |
| d14 | 2.072 | -0.011 | 2.145 | 3.054 | 3.102 | 94.258 | 25 | <0.001 | | 0.075 | 1.260 | 1.438 | 2.720 | 5.033 |
| d20 | 1.380 | -0.654 | 1.838 | 1.707 | 2.628 | 34.267 | 20 | 0.024 | | 0.038 | 0.773 | 0.872 | -3.245 | -2.150 |
| d21 | 1.843 | 0.642 | 2.019 | 2.724 | 1.985 | 52.622 | 22 | <0.001 | | 0.053 | 0.530 | 0.677 | -4.617 | -5.497 |
| d22 | 2.533 | 1.324 | 2.482 | 2.562 | 3.765 | 64.422 | 27 | <0.001 | | 0.053 | 0.747 | 0.959 | -1.610 | -0.440 |
| d26 | 2.288 | 1.108 | 2.330 | 3.091 | 2.624 | 60.041 | 28 | <0.001 | | 0.048 | 0.487 | 0.666 | -4.230 | -4.737 |
| d28 | 1.763 | 0.394 | 2.081 | 2.163 | 2.413 | 58.057 | 33 | 0.005 | | 0.039 | 0.674 | 0.760 | -3.370 | -3.298 |
| d31 | 1.389 | -0.015 | 1.296 | 1.756 | 2.520 | 59.614 | 30 | 0.001 | | 0.045 | 0.730 | 0.877 | -3.180 | -1.757 |
| Subscale 3 – Empowering Insight | | | | | | | | | | | | | | |
| d18 | -0.833 | -3.447 | -1.611 | 0.057 | 1.669 | 23.601 | 14 | 0.051 | | 0.038 | 0.596 | 0.626 | -6.845 | -6.689 |
| d19 | -0.800 | -3.124 | -2.102 | 0.071 | 1.956 | 28.318 | 15 | 0.020 | | 0.043 | 0.660 | 0.697 | -5.702 | -5.188 |
| d24 | -0.740 | -3.217 | -1.864 | 0.169 | 1.951 | 26.336 | 14 | 0.023 | | 0.043 | 0.793 | 0.837 | -3.301 | -2.654 |
| d36 | -0.671 | -2.703 | -2.179 | 0.102 | 2.095 | 20.243 | 15 | 0.163 | | 0.027 | 0.735 | 0.776 | -4.202 | -3.665 |
| IRT-model | | **Subscale** | **AIC** | **SABIC** | **HQ** | **BIC** | **logLik** | | **χ2** | **Df** | **p-value** |  |  |  |
| PCM | | 1 | 19091.42 | 19170.79 | 19232.97 | 19450.05 | -9457.711 | |  |  |  |  |  |  |
| GPCM | | 1 | 18956.45 | 19054.76 | 19131.78 | 19400.67 | -9369.227 | | 176.968 | 21 | <0.01 |  |  |  |
| PCM | | 2 | 6459.663 | 6484.558 | 6499.308 | 6550.735 | -3205.816 | |  |  |  |  |  |  |
| GPCM | | 2 | 6353.428 | 6384.584 | 6403.023 | 6479.806 | -3146.714 | | 118.205 | 6 | <0.01 |  |  |  |
| PCM | | 3 | 4823.236 | 4840.514 | 4851.217 | 4894.471 | -2394.618 | |  |  |  |  |  |  |
| GPCM | | 3 | 4807.118 | 4827.445 | 4840.038 | 4890.925 | -2383.559 | | 22.117 | 3 | <0.01 |  |  |  |

Note: Bolded item numbers indicate Items included in the final questionnaire. RMSEA values <0.01, <0.05, and <0.08 indicate excellent, good, and mediocre fit. Infit and outfit z-statistics 0.50-1.50 are acceptable.

Abbreviations: AIC, Akaike information criterion; BIC, Bayesian information criterion ; df, degrees of freedom; d1-36, draft items 1-36; GPCM, general partial credit model; HQ, Hannan-Quinn criterion; IRT, item response theory; logLik, log likelihood test; MSQ, mean square; PCM, partial credit model; RMSEA, root mean square of error approximation; SABIC, sample-size adjusted BIC; z-stat, z-statistic; χ2, Pearson’s chi-square
