# Supplementary material for: EMPOWER-UP: psychometric evaluation of a generic questionnaire for assessing empowerment in relational decision-making and problem-solving among adults with long-term health conditions
Source: Research Square preprint supplement (doi:10.21203/rs.3.rs-3772053/v2), 2025-12-15
Supplement: Supplementary file 2 [file db6068c05793c0a42d27eb03.docx]

| **Additional file 2. Results from exploratory factor analysis with oblimin rotation** | |  | | |  |  |  |
| --- | --- | --- | --- | --- | --- | --- | --- |
| **Draft item no. (final item no.) and content** | | **Factors** | | | **H2** | **U2** | **Com** |
| **F1** | **F3** | **F2** |
| **d7** | Through the interaction we managed to get to what I believe is the heart of the matter in my situation/condition/illness | 0.93 |  |  | 0.79 | 0.21 | 1.1 |
| d6 | The healthcare professional asked what I think about my situation/condition/illness | 0.89 |  |  | 0.67 | 0.33 | 1.0 |
| d3 | The healthcare professional showed interest in my experience with my situation/condition/illness | 0.83 |  |  | 0.86 | 0.14 | 1.1 |
| **d4** | There was room in the interaction for me to explain what was difficult or challenging for me | 0.83 |  |  | 0.85 | 0.15 | 1.0 |
| d2 | The healthcare professional took me seriously | 0.72 | 0.35 |  | 0.84 | 0.16 | 1.5 |
| d1 | I could talk openly about my difficulties with managing my situation/condition/illness | 0.68 |  |  | 0.74 | 0.26 | 1.2 |
| **d11** | The healthcare professional gave me room to explain how it really is for me to live with the situation/condition/illness | 0.66 |  |  | 0.78 | 0.22 | 1.2 |
| **d5** | The interaction with the healthcare professional strengthened my understanding of my situation/condition/illness | 0.60 |  |  | 0.76 | 0.24 | 1.4 |
| **d8** | The healthcare professional and I reflected together on my handling of the situation/condition/illness | 0.53 |  |  | 0.69 | 0.31 | 1.7 |
| **d13** | There was room for me to share my views on the situation/condition/illness even if they were different from the healthcare professional’s | 0.50 | 0.30 |  | 0.63 | 0.37 | 1.7 |
| d10 | There was focus on something that we both believed was important for me | 0.48 | 0.40 |  | 0.78 | 0.22 | 2.0 |
| **d9** | I felt involved in important decisions about my situation/condition/illness | 0.47 | 0.39 |  | 0.80 | 0.20 | 2.1 |
| **d15** | Both my experience of living with the situation/condition/illness and the healthcare professional’s professional knowledge influenced the decision about what to do | 0.43 |  |  | 0.55 | 0.45 | 1.9 |
| **d32** | I received adequate support to make my life and my situation/condition/illness fit together | 0.40 |  | 0.36 | 0.73 | 0.27 | 2.6 |
| **d16** | The interaction made me want to continue with that particular healthcare professional | 0.37 | 0.38 |  | 0.80 | 0.20 | 2.8 |
| **d22** | The healthcare professional showed frustration towards me |  | 0.89 |  | 0.75 | 0.25 | 1.0 |
| **d20** | During the interaction it was only the healthcare professional who decided what we should discuss |  | 0.84 |  | 0.70 | 0.30 | 1.0 |
| **d26** | The healthcare professional seemed to have given up on me |  | 0.83 |  | 0.81 | 0.19 | 1.0 |
| **d28** | The interaction with the healthcare professional made me want to withdraw |  | 0.78 |  | 0.78 | 0.22 | 1.1 |
| d12 | The healthcare professional mistakenly believed that s/he understood my situation/condition/illness |  | 0.78 |  | 0.57 | 0.43 | 1.1 |
| d14 | Irrelevant small talk took up too much time during the interaction |  | 0.65 |  | 0.43 | 0.57 | 1.1 |
| **d21** | I felt that the interaction with the healthcare professional was a waste of time |  | 0.64 |  | 0.75 | 0.25 | 1.3 |
| **d31** | The interaction seemed too superficial to have any significance for my situation/condition/illness |  | 0.63 |  | 0.78 | 0.22 | 1.5 |
| d33 | I felt comfortable telling the healthcare professional if I, in my management of the situation/condition/illness, made different choices than agreed upon |  | 0.60 |  | 0.57 | 0.43 | 1.2 |
| d25 | During the interaction, the healthcare professional appeared to take-over all responsibility for my situation/condition/illness |  | 0.55 |  | 0.24 | 0.76 | 1.1 |
| **d27** | The healthcare professional strengthened my confidence that I can handle challenges in my situation/condition/illness in the future |  | 0.49 | 0.35 | 0.73 | 0.27 | 2.0 |
| **d35** | I felt that the healthcare professional used knowledge about me in a constructive way |  | 0.49 | 0.33 | 0.68 | 0.32 | 1.9 |
| **d30** | The healthcare professional recognized the importance of my efforts in managing the situation/condition/illness |  | 0.48 |  | 0.62 | 0.38 | 1.8 |
| d34 | Through the interaction, the healthcare professional supported me in seeing my strong sides |  | 0.41 | 0.38 | 0.67 | 0.33 | 2.3 |
| **d18** | Through the interaction I became aware of some things I can do myself to manage my situation/condition/illness |  |  | 0.89 | 0.80 | 0.20 | 1.0 |
| **d24** | The healthcare professional gave me something to think about in relation to my way of managing my situation/condition/illness |  |  | 0.74 | 0.70 | 0.30 | 1.1 |
| d29 | We identified some things that made it clear to me that I must act differently to manage my situation/condition/illness in future |  |  | 0.70 | 0.37 | 0.63 | 1.1 |
| **d19** | The interaction gave me a clear picture of the benefits I can get from managing my situation/condition/illness in an ideal way in everyday life |  |  | 0.68 | 0.73 | 0.27 | 1.3 |
| **d36** | The interaction gave me a deeper insight into my way of managing the situation/condition/illness |  |  | 0.63 | 0.74 | 0.26 | 1.3 |
| **d23** | Through the interaction I got a valuable insight into the healthcare professional’s thoughts about my way of managing the situation/condition/illness |  |  | 0.51 | 0.54 | 0.46 | 1.5 |
| d17 | During the interaction there was room to talk about difficult topics | 0.33 |  | 0.42 | 0.70 | 0.30 | 2.4 |
| **Eigenvalues** | | 9.42 | 9.41 | 6.12 |  |  |  |
| **Proportion Variance** | | 0.26 | 0.26 | 0.17 |  |  |  |
| **Cumulative Variance** | | 0.26 | 0.52 | 0.69 |  |  |  |
| **Correlations** | |  |  |  |  |  |  |
| F1 | | 1.00 | 0.75 | 0.65 |  |  |  |
| F3 | | 0.75 | 1.00 | 0.51 |  |  |  |
| F2 | | 0.65 | 0.51 | 1.00 |  |  |  |

Note: Items included in the final version have bolded item numbers. Critical h2 values are >0.50

Abbreviations: Com, complexity; d1-36, draft items 1-36; H2, Communality; U2, Uniqueness

Figure 3 Wright Maps depicting item locations (to the right) relative to person locations (to the left) in the three subscales in EMPOWER-UP
