# Supplementary material for: EMPOWER-UP: psychometric evaluation of a generic questionnaire for assessing empowerment in relational decision-making and problem-solving among adults with long-term health conditions
Source: Research Square preprint supplement (doi:10.21203/rs.3.rs-3772053/v2), 2025-12-15
Supplement: Supplementary file 3 [file e9ccb6d2ee6c1430d5720e59.docx]

| **Additional file 4.** Final Danish and English versions of EMPOWER-UP | |  | | | | |
| --- | --- | --- | --- | --- | --- | --- |
| **Final Danish version of EMPOWER-UP** | |  | | | | |
| **Udsagn nummer og indhold** | | **Svarkategorier** | | | | |
| **Meget uenig 0** | **Uenig  1** | **Hverken enig eller uenig 2** | **Enig**  **3** | **Meget enig**  **4** |
| 1 | Der var plads i samspillet til, at jeg kunne fortælle, hvad der var svært eller udfordrende for mig |  |  |  |  |  |
| 2 | Samspillet med den sundhedsprofessionelle styrkede min forståelse af min situation/tilstand/sygdom |  |  |  |  |  |
| 3 | Igennem samspillet lykkedes det os at komme ind til det, jeg mener er sagens kerne i min situation/tilstand/sygdom |  |  |  |  |  |
| 4 | Den sundhedsprofessionelle og jeg reflekterede sammen over min håndtering af situationen/tilstanden/sygdommen |  |  |  |  |  |
| 5 | Jeg følte mig involveret i vigtige beslutninger omkring min situation/tilstand/sygdom |  |  |  |  |  |
| 6 | Den sundhedsprofessionelle gav mig plads til at forklare, hvordan det i virkeligheden er for mig at leve med situationen/tilstanden/sygdommen |  |  |  |  |  |
| 7 | Der var plads til, at jeg kunne dele mine synspunkter om situationen/tilstanden/sygdommen, selv hvis de var forskellige fra den sundhedsprofessionelles |  |  |  |  |  |
| 8 | Både min erfaring med at leve med situationen/tilstanden/sygdommen og den sundhedsprofessionelles faglige viden fik indflydelse på beslutningen om, hvad der skulle gøres |  |  |  |  |  |
| 9 | Samspillet gav mig lyst til at fortsætte hos netop denne sundhedsprofessionelle |  |  |  |  |  |
| 10 | Gennem samspillet opdagede jeg nogle ting, jeg selv kan gøre for at håndtere min situation/tilstand/sygdom |  |  |  |  |  |
| 11 | Samspillet gav mig et klart billede af, hvilke fordele jeg kan have af at håndtere situationen/tilstanden/sygdommen på en ideel måde i hverdagen |  |  |  |  |  |
| 12 | I samspillet var det kun den sundhedsprofessionelle, der bestemte, hvad vi skulle snakke om |  |  |  |  |  |
| 13 | Jeg oplevede samspillet med den sundhedsprofessionelle som spild af tid |  |  |  |  |  |
| 14 | Den sundhedsprofessionelle viste frustration over mig |  |  |  |  |  |
| 15 | Igennem samspillet fik jeg et værdifuldt indblik i den sundhedsprofessionelles tanker om min måde at håndtere situationen/tilstanden/sygdommen på |  |  |  |  |  |
| 16 | Den sundhedsprofessionelle gav mig noget at tænke over, i forhold til min måde at håndtere min situation/tilstand/sygdom på |  |  |  |  |  |
| 17 | Den sundhedsprofessionelle virkede til at have opgivet mig |  |  |  |  |  |
| 18 | Den sundhedsprofessionelle styrkede min tillid til, at jeg kan håndtere udfordringer i min situation/tilstand/sygdom fremover |  |  |  |  |  |
| 19 | Samspillet med den sundhedsprofessionelle gav mig lyst til at trække mig |  |  |  |  |  |
| 20 | Den sundhedsprofessionelle anerkendte betydningen af min indsats i håndteringen af situationen/tilstanden/sygdommen |  |  |  |  |  |
| 21 | Samspillet virkede for overfladisk til at få nogen betydning for min situation/tilstand/sygdom |  |  |  |  |  |
| 22 | Jeg fik tilstrækkelig støtte til at få mit liv og min situation/tilstand/sygdom til at hænge sammen |  |  |  |  |  |
| 23 | Jeg oplevede, at den sundhedsprofessionelle brugte viden om mig på en konstruktiv måde |  |  |  |  |  |
| 24 | Samspillet gav mig en dybere indsigt i min måde at håndtere situationen/tilstanden/sygdommen på |  |  |  |  |  |

Item scoring: Meget uenig, 0; Uenig, 1; Hverken enig eller uenig, 2; Enig, 3; Meget enig, 4
Subskala scoring: Empowerment-styrkende mekanismer (14 items): sum score for 1-9, 15, 18, 20, 22, 23; total score, 0-56; Højere scores indikerer tilstedeværelsen af flere empowerment

styrkende mekanismer

Empowerment-hæmmende mekanismer (6 items): sum scorer for 12-14, 17, 19, 21; total score, 0-24. Højere scores indikerer tilstedeværelsen af flere empowerment

hæmmende mekanismer.

Empowerment-styrkende indsigt (4 udsagn): sum scorer for 10, 11, 16, 24; total score på 0-16. Højere scores indikerer mere opnået empowerment-styrkende indsigt.

| **Final English version of EMPOWER-UP** | | |  | | | | |
| --- | --- | --- | --- | --- | --- | --- | --- |
| **Item number and content** | | | **Response options** | | | | |
| **Strongly disagree 0** | **Disagree  1** | **Neither agree nor disagree 2** | **Agree**  **3** | **Strongly agree**  **4** |
| 1 | (4) | There was room in the interaction for me to explain what was difficult or challenging for me |  |  |  |  |  |
| 2 | (5) | The interaction with the healthcare professional strengthened my understanding of my situation/condition/illness |  |  |  |  |  |
| 3 | (7) | Through the interaction we managed to get to what I believe is the heart of the matter in my situation/condition/illness |  |  |  |  |  |
| 4 | (8) | The healthcare professional and I reflected together on my handling of the situation/condition/illness |  |  |  |  |  |
| 5 | (9) | I felt involved in important decisions about my situation/condition/illness |  |  |  |  |  |
| 6 | (11) | The healthcare professional gave me room to explain how it really is for me to live with the situation/condition/illness |  |  |  |  |  |
| 7 | (13) | There was room for me to share my views on the situation/condition/illness even if they were different from the healthcare professional's |  |  |  |  |  |
| 8 | (15) | Both my experience of living with the situation/condition/illness and the healthcare professional’s professional knowledge influenced the decision about what to do |  |  |  |  |  |
| 9 | (16) | The interaction made me want to continue with that particular healthcare professional |  |  |  |  |  |
| 10 | (18) | Through the interaction I became aware of some things I can do myself to manage my situation/condition/illness |  |  |  |  |  |
| 11 | (19) | The interaction gave me a clear picture of the benefits I can get from managing my situation/condition/illness in an ideal way in everyday life |  |  |  |  |  |
| 12 | (20) | During the interaction it was only the healthcare professional who decided what we should discuss |  |  |  |  |  |
| 13 | (21) | I felt that the interaction with the healthcare professional was a waste of time |  |  |  |  |  |
| 14 | (22) | The healthcare professional showed frustration towards me |  |  |  |  |  |
| 15 | (23) | Through the interaction I got a valuable insight into the healthcare professional’s thoughts about my way of managing the situation/condition/illness |  |  |  |  |  |
| 16 | (24) | The healthcare professional gave me something to think about in relation to my way of managing my situation/condition/illness |  |  |  |  |  |
| 17 | (26) | The healthcare professional seemed to have given up on me |  |  |  |  |  |
| 18 | (27) | The healthcare professional strengthened my confidence that I can handle challenges in my situation/condition/illness in the future |  |  |  |  |  |
| 19 | (28) | The interaction with the healthcare professional made me want to withdraw |  |  |  |  |  |
| 20 | (30) | The healthcare professional recognized the importance of my efforts in managing the situation/condition/illness |  |  |  |  |  |
| 21 | (31) | The interaction seemed too superficial to have any significance for my situation/condition/illness |  |  |  |  |  |
| 22 | (32) | I received adequate support to make my life and my situation/condition/illness fit together |  |  |  |  |  |
| 23 | (35) | I felt that the healthcare professional used knowledge about me in a constructive way |  |  |  |  |  |
| 24 | (36) | The interaction gave me a deeper insight into my way of managing the situation/condition/illness |  |  |  |  |  |

Note: Superscripted numbers indicate item numbers in the draft version
Item scoring: Strongly disagree, 0; Disagree, 1; Neither agree nor disagree, 2; Agree, 3; Strongly agree, 4
Subscale scoring: Empowering mechanisms (14 items): sum scores for 1-9, 15, 18, 20, 22, 23; total score range, 0-56. Higher scores indicate more empowering mechanisms

Disempowering mechanisms (6 items): sum scores for 12-14, 17, 19, 21; total score range, 0-24. Higher scores indicate more disempowering mechanisms.

Empowering insight (4 items): sum scores for 10, 11, 16, 24; total score range, 0-16. Higher scores indicate more empowering insight obtained.
